# Supplementary material
Source: PubMed Central journal article supplement (PMC4249026)
Supplement: AEM.01422-14_zam999105743so1.pdf [file AEM.01422-14_zam999105743so1.pdf]

## Supporting Online Material for

### **Microbial odor profile of polyester and cotton clothes after a fitness session**

Chris Callewaert<sup>1</sup>, Evelyn De Maeseneire<sup>1</sup>, Frederiek-Maarten Kerckhof<sup>1</sup>,  
Arne Verliefde<sup>2,3</sup>, Tom Van de Wiele<sup>1</sup>, Nico Boon<sup>1\*</sup>

**This PDF file includes:**

Materials & Methods

Figures S1 to S4

Tables S1 to S3

References

**Author affiliation:** <sup>1</sup> Laboratory of Microbial Ecology and Technology (LabMET), Ghent University, Coupure Links 653, 9000 Gent, Belgium | <sup>2</sup> Particle and Interfacial Technology Group (PaInT), Ghent University, Coupure Links 653, 9000 Gent, Belgium | <sup>3</sup> Department of Sanitary Engineering, Delft University of Technology, Stevinweg 1, 2628CN Delft, the Netherlands

\* Correspondence to: Nico Boon, Ghent University, LabMET, Belgium; phone: +329 264 59 76; fax: +329 264 62 48; e-mail: nico.boon@ugent.be; webpage: [www.labmet.ugent.be](http://www.labmet.ugent.be); [www.drarpit.com](http://www.drarpit.com).

## **SUPPORTING MATERIALS & METHODS**

### **Optimization bacterial extraction procedure**

To choose the best bacterial extraction procedure, two different extraction buffers were tested and two different concentration procedures were tested. TNE buffer and 1x PBS + 0.2% Tween 80 buffer (1) were chosen as buffers. One technique to concentrate the bacteria was by means of vacuum pumping the water through a bacterium-impermeable sterile filter. Another technique was by means of centrifugation into a bacterial pellet. Figure S1 represents the DGGE pattern of one clothing textile worn by one person for two days. The bacteria were extracted using the PBS and TNE buffers. The UltraClean Water DNA isolation kit (MoBio Laboratories, Inc., CA) was used to extract the DNA. From the results, the pelletized TNE buffer method was chosen as most efficient method.

### **Optimization DNA extraction procedure**

Several DNA extraction protocols were tested for their efficacy and their result on DGGE: the CTAB extraction (2, 3), UltraClean Water DNA isolation kit (MoBio Laboratories, Inc., CA), the DNeasy Blood & Tissue kit (Qiagen, CA) and the DNA extraction for textiles according Teufel *et al.* (1). Full protocols can be found in the references or are according manufacturers protocol. Figure S2 represents the DGGE results for four different clothes for the four DNA extraction protocols. From this result, the UltraClean Water DNA isolation kit was chosen for further analysis.

## SUPPORTING FIGURES

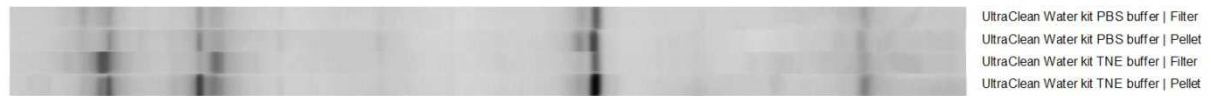

**Figure S1:** Comparison of two different concentration techniques and bacterial extraction buffers.

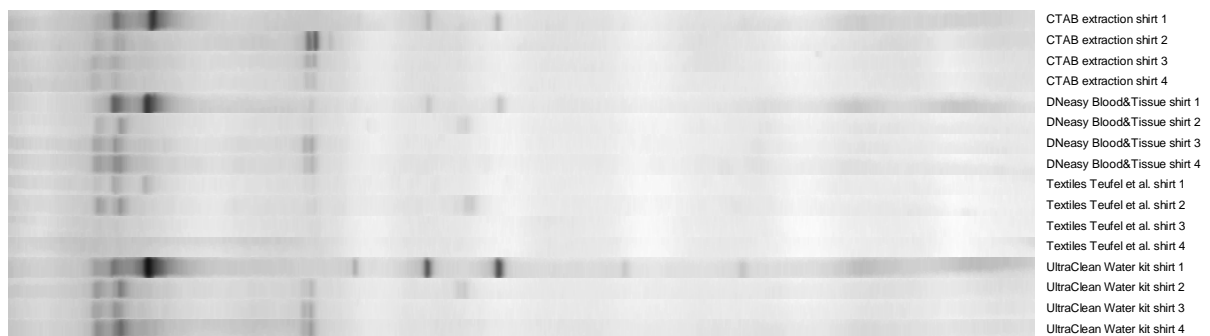

**Figure S2:** Comparison of four different DNA extraction techniques for shirt 1 = tanktop worn by person 1 during exercise; shirt 2 = T-shirt where person 1 did sport exercise for half an hour; shirt 3 = T-shirt from person 1 worn during a warm day; shirt 4 = shirt from person 1 worn during a warm day.

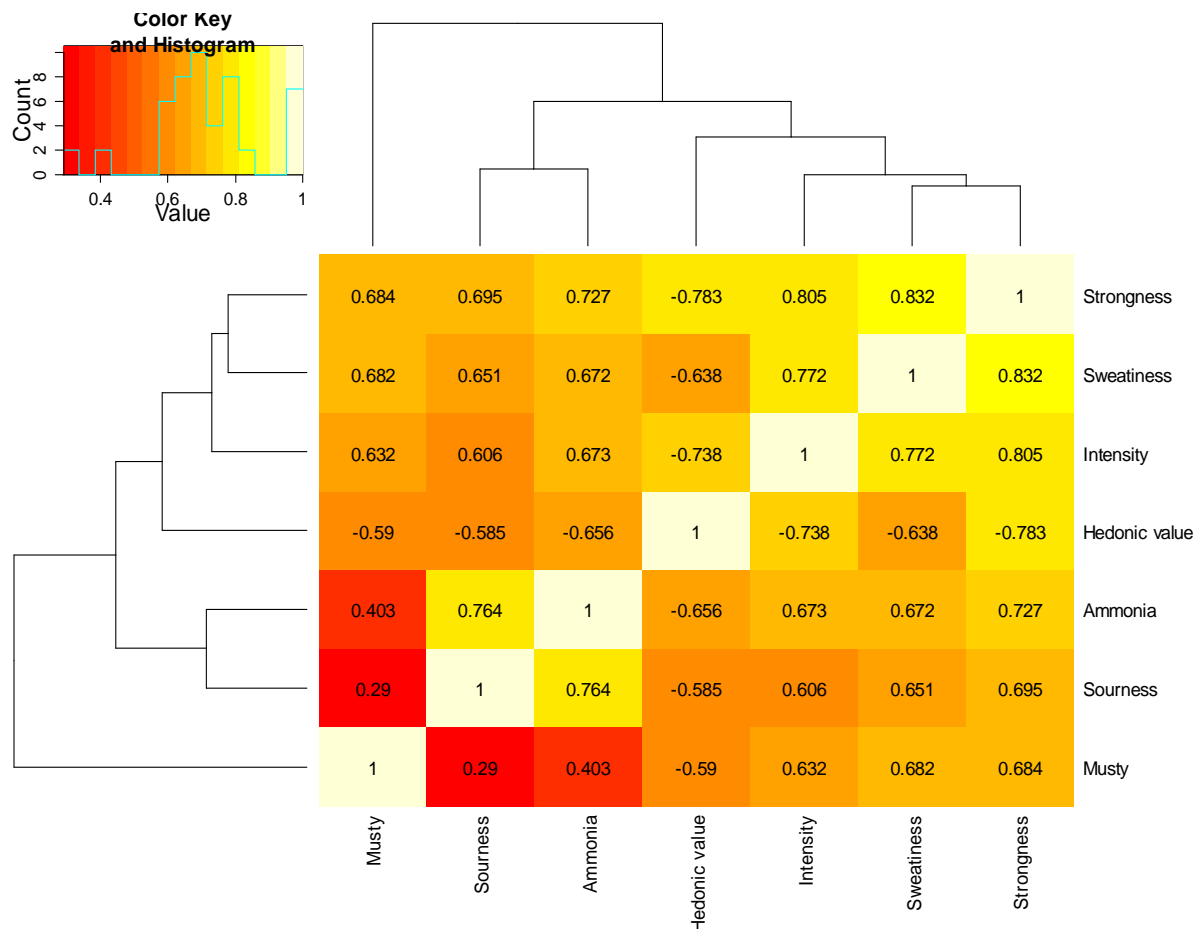

**Figure S3:** Heatmap with the correlations between the factors hedonic value, intensity, sweatiness, ammonia, sourness, musty, strongness for the 100% cotton and 100% polyester T-shirts. The heatmap shows the correlations/differences between the different odor characteristics. No characteristics were identical, proving their value in the odor assessment.

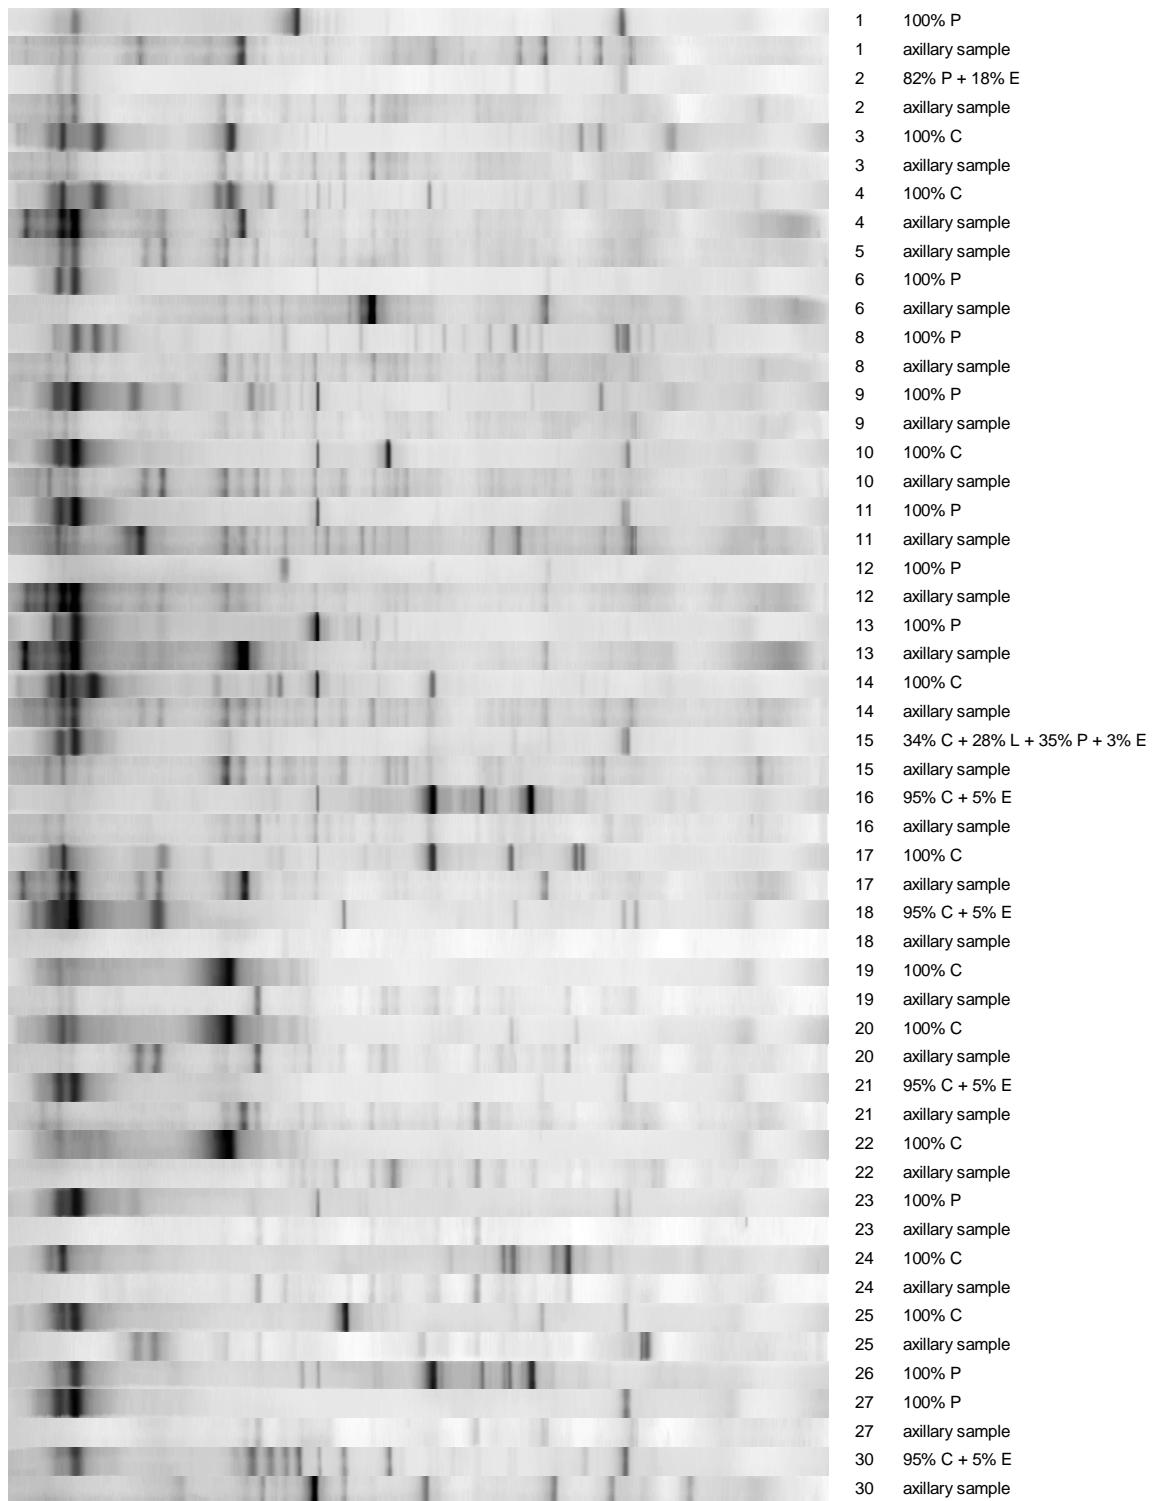

**Figure S4:** Comparison of DGGE results of the individual axillary samples with the individual clothing samples.

## SUPPORTING TABLES

**Table S1:** Results of the odor panel of the different groups of T-shirts. Textile type C = cotton, P = polyester and E = elastin.

| <b>Total</b> | <b>Textile</b>      | <b>Hedonic value</b> | <b>Intensity</b> | <b>Musty</b> | <b>Ammonia</b> | <b>Strongness</b> | <b>Sweatiness</b> | <b>Sourness</b> |
|--------------|---------------------|----------------------|------------------|--------------|----------------|-------------------|-------------------|-----------------|
| <b>10</b>    | 42% 100% P          | -2.04±0.90           | 3.94±0.90        | 5.84±1.64    | 4.16±1.99      | 5.82±1.97         | 6.09±1.17         | 4.59±1.81       |
| <b>10</b>    | 42% 100% C          | -0.61±1.08           | 2.40±0.86        | 3.89±1.12    | 1.83±1.03      | 3.16±1.54         | 3.90±1.39         | 2.26±1.82       |
| <b>4</b>     | 17% 95% C<br>+ 5% E | -0.60±0.55           | 2.55±0.34        | 3.71±0.84    | 1.05±0.39      | 2.21±0.76         | 3.40±0.70         | 1.64±0.31       |

**Table S2:** Contact angle between cellulose, PET, micrococci and water, diiodomethane, glycerol.

|                       | <b>Contact angle (°)</b> |               |             |
|-----------------------|--------------------------|---------------|-------------|
|                       | water                    | diiodomethane | glycerol    |
| Cotton/cellulose      | 81.0                     | 39.0          | 90.0        |
|                       | 84.0                     | 47.0          | 87.9        |
|                       | 85.5                     | 46.5          | 88.0        |
|                       | 84.8                     | 47.1          | 92.1        |
|                       | 80.4                     | 49.0          | 94.0        |
|                       | 87.6                     | 46.7          | 86.5        |
|                       | 84.4                     | 48.7          | 79.3        |
|                       | 80.5                     | 43.3          | 80.1        |
|                       | 82.0                     |               | 86.0        |
|                       |                          | 82.5          |             |
| Average               | 83.36 ±2.51              | 45.91 ±3.28   | 86.64 ±4.86 |
| Rejected measurements | 3                        | 3             | 0           |
| Polyester/ PET        | 79.5                     | 28.75         | 65.4        |
|                       | 75.9                     | 28.25         | 57.0        |
|                       | 68.5                     | 28.0          | 57.0        |
|                       | 69.75                    | 38.3          | 63.5        |
|                       | 75.0                     | 33.2          | 64.5        |
|                       | 79.4                     | 25.4          | 68.5        |
|                       | 75.7                     | 22.0          | 66.1        |
|                       | 78.25                    | 24.4          | 64.8        |
|                       | 75.42                    |               | 64.6        |
|                       |                          | 63.5          |             |
| Average               | 75.27 ±3,89              | 28.54 ±5.17   | 63.49 ±3.71 |
| Rejected measurements | 3                        | 2             | 1           |
| Micrococci            | 24.0                     | 69.7          | 22.0        |
|                       | 38.5                     | 75.6          | 27.5        |
|                       | 26.0                     | 62.3          | 26.0        |
|                       | 22.0                     | 56.5          | 29.5        |
|                       | 21.5                     |               |             |
| Average               | 26.60 ±6,92              | 66.02 ±8.38   | 26.25 ±3.18 |
| Rejected measurements | 10                       | 7             | 6           |

**Table S3:** Calculated surface tension components for cellulose, PET and micrococci from the contact angle measurements.

| (mJ/m <sup>2</sup> ) | $\gamma^{LW}$ | $\gamma^+$ | $\gamma^-$ |
|----------------------|---------------|------------|------------|
| Cotton / cellulose   | 36.52         | 0.00       | 4.14       |
| Polyester / PET      | 44.81         | 0.08       | 6.58       |
| Micrococci           | 25.12         | 5.92       | 43.38      |

### SUPPORTING REFERENCES

1. **Teufel L, Schuster KC, Merschak P, Bechtold T, Redl B.** 2008. Development of a fast and reliable method for the assessment of microbial colonization and growth on textiles by DNA quantification. *J. Mol. Microbiol. Biotechnol.* **14**:193-200.
2. **Kowalchuk GA, Bodelier PLE, Heilig GHJ, Stephen JR, Laanbroek HJ.** 1998. Community analysis of ammonia-oxidising bacteria, in relation to oxygen availability in soils and root-oxygenated sediments, using PCR, DGGE and oligonucleotide probe hybridisation. *FEMS Microbiol. Ecol.* **27**:339-350.
3. **Griffiths RI, Whiteley AS, O'Donnell AG, Bailey MJ.** 2000. Rapid method for coextraction of DNA and RNA from natural environments for analysis of ribosomal DNA- and rRNA-based microbial community composition. *Appl. Environ. Microbiol.* **66**:5488-5491.
